# Supplementary material for: Genetic Variation in Cell Death Genes and Risk of Non-Hodgkin Lymphoma
Source: PubMed Central journal article supplement (PMC3274532; doi:10.1371/journal.pone.0031560), 2012-02-07
Supplement: pone.0031560.s002.pdf [file pone.0031560.s002.pdf]

**Table S2 - Characteristics of the samples sequenced.**

|                          | Cases (%)        | Controls (%) |
|--------------------------|------------------|--------------|
| <b>Gender</b>            |                  |              |
| Male                     | 36 (77%)         | -            |
| Female                   | 11 (23%)         | -            |
| <b>Age group (years)</b> |                  |              |
| 20-49                    | 23 (49%)         | -            |
| 50-59                    | 24 (51%)         | -            |
| 60-69                    | -                | -            |
| 70+                      | -                | -            |
| <b>Ethnicity</b>         |                  |              |
| Caucasian                | 35 (74%)         | -            |
| Asian                    | 10 (21%)         | -            |
| South Asian              | 2 (4%)           | -            |
| Mixed/Other              | -                | -            |
| Unknown/Refused          | -                | -            |
| <b>Pathology</b>         |                  |              |
| <b>B-cell lymphomas</b>  |                  |              |
| DLBCL                    | 13 (28%)         | -            |
| FL                       | 16 (34%)         | -            |
| MZL/ MALT                | 6 (13%)          | -            |
| MCL                      | 2 (4%)           | -            |
| SLL/CLL                  | -                | -            |
| LPL                      | 2 (4%)           | -            |
| MISC BCL                 | 4 (9%)           | -            |
| <b>T-cell lymphomas</b>  |                  |              |
| MF                       | 1 (2%)           | -            |
| PTCL                     | -                | -            |
| MISC TCL                 | 3 (6%)           | -            |
| <b>Total</b>             | <b>47 (100%)</b> |              |

DLBCL = Diffuse Large B-Cell Lymphoma, FL = Follicular Lymphoma, MZ/MALT = Marginal Zone lymphoma/Mucosa-Associated Lymphoma Tissue lymphoma, MCL = Mantle Cell lymphoma, SLL = Small Lymphocytic Lymphoma, LPL=Lymphoplasmacytic Lymphoma, Misc. B-cell = Miscellaneous B-cell lymphoma, MF = Mycosis Fungoides, PTCL = Peripheral T-Cell Lymphoma, Misc. T-cell = Miscellaneous T-cell lymphoma
