# Supplementary material for: Genetic Variation in Cell Death Genes and Risk of Non-Hodgkin Lymphoma
Source: PubMed Central journal article supplement (PMC3274532; doi:10.1371/journal.pone.0031560), 2012-02-07
Supplement: pone.0031560.s003.pdf [file pone.0031560.s003.pdf]

**Table S3 - PCR primers and reaction conditions**

| <b>Amplicon Name</b> | <b>Ann. Temp.</b> | <b>Enhancer*</b> | <b>Reaction times*</b> | <b>No. of cycles*</b> |
|----------------------|-------------------|------------------|------------------------|-----------------------|
| BAX_exon1            | 65                |                  |                        | 35x                   |
| BAX_exon2&3          | 65                |                  |                        | 35x                   |
| BAX_exon4            | 64                |                  |                        |                       |
| BAX_exon5            | 61                |                  |                        |                       |
| BAX_exon6            | 64                |                  |                        |                       |
| BAX_exon7            | 65                |                  |                        | 35x                   |
| BAX_upstr_b          | 65                |                  |                        | 35x                   |
| BCL10_alt_upstr      | 62                |                  |                        | 35x                   |
| BCL10_upstr_b        | 58                |                  | 10s ann                | 45x                   |
| BCL2_upstr_a         | 54                | 2x               | 5s ann, 10s ext        | 36x                   |
| BCL2_upstr_b         | 50                | 2x               | 5s ann, 10 s ext       | 36x                   |
| BCL6_exon1           | 63                |                  |                        |                       |
| BCL6_exon10a         | 56                |                  |                        | 35x                   |
| BCL6_exon10b         | 54                |                  |                        | 35x                   |
| BCL6_exon2           | 63                |                  |                        |                       |
| BCL6_exon3           | 65                |                  | 10s ann                | 35x                   |
| BCL6_exon4           | 64                |                  |                        | 35x                   |
| BCL6_exon5a          | 62                |                  |                        |                       |
| BCL6_exon5b          | 61                |                  |                        |                       |
| BCL6_exon6           | 61                |                  |                        |                       |
| BCL6_exon7           | 65                |                  |                        | 35x                   |
| BCL6_exon8           | 61                |                  | 15s ann                |                       |
| BCL6_exon9           | 65                |                  |                        | 35x                   |
| BCL6_upstr_a         | 59                |                  |                        | 35x                   |
| BCL6_upstr_b         | 59                |                  |                        | 35x                   |
| BECN1_exon1&2        | 61                |                  |                        |                       |
| BECN1_exon10         | 59                |                  |                        | 35x                   |
| BECN1_exon11         | 59                |                  |                        |                       |
| BECN1_exon12a        | 52                |                  |                        |                       |
| BECN1_exon12b        | 52                |                  |                        |                       |
| BECN1_exon3          | 61                |                  |                        |                       |
| BECN1_exon5&6&7      | 64                |                  |                        | 35x                   |
| BECN1_exon8          | 62                |                  |                        |                       |
| BECN1_exon9          | 61                |                  |                        | 35x                   |
| BECN1_upstr_a        | 56                |                  |                        | 35x                   |
| BECN1_upstr_b        | 54                |                  | 15s ann                | 35x                   |
| BIM_upstr_a          | 57                |                  |                        | 35x                   |
| BIM_upstr_b          | 57                |                  |                        | 35x                   |
| BMI_exon10a          | 57                |                  |                        |                       |
| BMI_exon10b          | 57                |                  |                        |                       |
| BMI_exon10c          | 56                |                  |                        | 35x                   |
| BMI_exon10d          | 54                |                  |                        | 35x                   |
| BMI_exon1a           | 59                |                  | 15s ann                |                       |
| BMI_exon1b           | 50                | 2x               | 5s ann, 10 s ext       | 36x                   |
| BMI_exon2&3          | 56                |                  |                        |                       |
| BMI_exon4&5          | 52                |                  |                        |                       |
| BMI_exon6&7          | 59                |                  |                        |                       |
| BMI_exon8&9          | 56                |                  |                        |                       |
| BMI1_up_a            | 56                |                  |                        | 47x                   |
| BMI1_upstr_b         | 58                | 2x               | 5s ann, 10s ext        | 36x                   |
| FAS_alt_upstr_a      | 50                |                  |                        | 35x                   |
| FAS_alt_upstr_b      | 56                |                  |                        | 35x                   |

|                   |    |    |         |     |
|-------------------|----|----|---------|-----|
| FAS_upstr_a       | 60 |    | 10s ann | 40× |
| FAS_upstr_b       | 50 |    | 10s ann | 37× |
| MCL1_exon1a       | 63 |    |         |     |
| MCL1_exon1b       | 64 |    |         | 35× |
| MCL1_exon2        | 61 |    |         |     |
| MCL1_exon3b       | 65 |    |         | 35× |
| MCL1_upstr_a      | 64 |    |         | 35× |
| MCL1_upstr_b      | 63 |    |         | 35× |
| MDM2_alt_upstr    | 63 |    |         | 35× |
| MDM2_exon11a      | 61 |    |         | 35× |
| MDM2_exon11b      | 59 |    |         | 35× |
| MDM2_exon2        | 59 |    |         | 35× |
| MDM2_exon4        | 59 |    |         | 35× |
| MDM2_exon6&7      | 56 |    |         |     |
| MDM2_exon8        | 59 |    |         |     |
| MDM2_upstr_a      | 64 |    |         | 35× |
| MDM2_upstr_b      | 61 |    |         | 35× |
| miR15_upstr_A     | 50 |    | 10s ann | 40× |
| miR15_upstr_B     | 51 |    | 10s ann | 37× |
| miR155_loop       | 50 | 2× |         | 36× |
| miR155_upstr      | 50 | 2× |         |     |
| miR17_upstr_A     | 52 |    |         |     |
| miR17_upstr_B     | 51 |    |         | 36× |
| PMAIP1_exon1&2    | 65 |    |         | 35× |
| PMAIP1_exon3a     | 56 |    |         | 35× |
| PMAIP1_exon3b     | 54 |    |         | 35× |
| PMAIP1_exon3c     | 59 |    |         | 35× |
| PMAIP1_upstr_a    | 64 |    |         | 35× |
| PMAIP1_upstr_b    | 64 |    |         | 35× |
| PUMA_exon1        | 64 |    |         | 35× |
| PUMA_exon2        | 65 |    |         | 35× |
| PUMA_exon3        | 63 |    |         |     |
| PUMA_exon4a       | 64 |    |         | 35× |
| PUMA_exon4b       | 64 |    |         | 35× |
| PUMA_upstr_b      | 64 |    |         | 35× |
| RFWD2_alt_upstr_a | 54 |    |         | 35× |
| RFWD2_alt_upstr_b | 53 |    |         | 35× |
| RFWD2_upstr_a     | 56 |    | 10s ann | 37× |
| RFWD2_upstr_b     | 61 |    |         | 35× |
| SKP2_alt_upstr    | 62 |    |         | 35× |
| SKP2_upstr_a      | 61 |    |         | 35× |
| SKP2_upstr_b      | 65 |    |         | 35× |

\*Unless conditions are specified in above table, all conditions are as described in Methods.

| Amplicon Name   | Forward primer                                 |
|-----------------|------------------------------------------------|
| BAX_exon1       | TGTAAAACGACGGCCAGTatgctcattggacagtcacg         |
| BAX_exon2&3     | TGTAAAACGACGGCCAGTctgctaggggtcccagaagtcc       |
| BAX_exon4       | TGTAAAACGACGGCCAGTtcttttagtgtgcggtggatg        |
| BAX_exon5       | TGTAAAACGACGGCCAGTcttcgggtcttcatcctgag         |
| BAX_exon6       | TGTAAAACGACGGCCAGTtaggggaggcaaagaattgac        |
| BAX_exon7       | TGTAAAACGACGGCCAGTaatgcccgttcatctcagtc         |
| BAX_upstr_b     | TGTAAAACGACGGCCAGTGCTTCAGCCCGGGAAT             |
| BCL10_alt_upstr | TGTAAAACGACGGCCAGTGCTTCTTACACAGCGCCATA         |
| BCL10_upstr_b   | TGTAAAACGACGGCCAGTGCCTCATCCTACTTCCCTGT         |
| BCL2_upstr_a    | TGTAAAACGACGGCCAGTTCCGCCTCCGTCGTC              |
| BCL2_upstr_b    | TGTAAAACGACGGCCAGTGCTGCCAGCGAAGGTG             |
| BCL6_exon1      | TGTAAAACGACGGCCAGTcgacgtcacagaggaggag          |
| BCL6_exon10a    | TGTAAAACGACGGCCAGTtgagcaatgacatctttcttgg       |
| BCL6_exon10b    | TGTAAAACGACGGCCAGTcaagacttcagtatggtgtcaaagaga  |
| BCL6_exon2      | TGTAAAACGACGGCCAGTggcaagctgcaactatcaaa         |
| BCL6_exon3      | TGTAAAACGACGGCCAGTgctaagccacctgctctgat         |
| BCL6_exon4      | TGTAAAACGACGGCCAGTtaggggctgagtatcagtgct        |
| BCL6_exon5a     | TGTAAAACGACGGCCAGTaatggtcactggaaggtcatct       |
| BCL6_exon5b     | TGTAAAACGACGGCCAGTgagggcctcaaacctgct           |
| BCL6_exon6      | TGTAAAACGACGGCCAGTgcctacacacagggaggaga         |
| BCL6_exon7      | TGTAAAACGACGGCCAGTcggccttagagccctacct          |
| BCL6_exon8      | TGTAAAACGACGGCCAGTGGAAAACACAAGTGGCCTCA         |
| BCL6_exon9      | TGTAAAACGACGGCCAGTCTGGCTGTGTGCTAATGAGG         |
| BCL6_upstr_a    | TGTAAAACGACGGCCAGTCCCCCAACTCAGCTTCAA           |
| BCL6_upstr_b    | TGTAAAACGACGGCCAGTCGCTTGAGGGATTAGATAGGG        |
| BECN1_exon1&2   | TGTAAAACGACGGCCAGTtagcctccccattctctgc          |
| BECN1_exon10    | TGTAAAACGACGGCCAGTccttggccagaatgaagagt         |
| BECN1_exon11    | TGTAAAACGACGGCCAGTtgggaacaatctctggaagc         |
| BECN1_exon12a   | TGTAAAACGACGGCCAGTcctgccccgaacttacttaac        |
| BECN1_exon12b   | TGTAAAACGACGGCCAGTccagagctacaacatgccatc        |
| BECN1_exon3     | TGTAAAACGACGGCCAGTtcagatgccctcctgcttt          |
| BECN1_exon5&6&7 | TGTAAAACGACGGCCAGTagttaggtggaggaagcctct        |
| BECN1_exon8     | TGTAAAACGACGGCCAGTcgttcatagtgtggtgagagaga      |
| BECN1_exon9     | TGTAAAACGACGGCCAGTggtgagagtgggaaatgtcaa        |
| BECN1_upstr_a   | TGTAAAACGACGGCCAGTCAAGGGGAGATGGGAAATG          |
| BECN1_upstr_b   | TGTAAAACGACGGCCAGTCGGGATTTAACCATTTTG           |
| BIM_upstr_a     | TGTAAAACGACGGCCAGTAACAATCGCCTCGCCTTT           |
| BIM_upstr_b     | TGTAAAACGACGGCCAGTTCAGAGAAGTTCTGTCTGATTTCG     |
| BMI_exon10a     | TGTAAAACGACGGCCAGTcctggagaagggtagtagca         |
| BMI_exon10b     | TGTAAAACGACGGCCAGTtttggctataaaaagatggactaca    |
| BMI_exon10c     | TGTAAAACGACGGCCAGTgacataaacaggaaacagttattgatga |
| BMI_exon10d     | TGTAAAACGACGGCCAGTaaagagttgcttttacagttaacaatg  |
| BMI_exon1a      | TGTAAAACGACGGCCAGTggcctgactacaccgacact         |
| BMI_exon1b      | TGTAAAACGACGGCCAGTCAGCCCCGAGAATAAAAC           |
| BMI_exon2&3     | TGTAAAACGACGGCCAGTttgtgattactagatgatctccattc   |
| BMI_exon4&5     | TGTAAAACGACGGCCAGTtagacagcatcacaatcaagtaaaa    |
| BMI_exon6&7     | TGTAAAACGACGGCCAGTttgactttaccacttccatcctc      |
| BMI_exon8&9     | TGTAAAACGACGGCCAGTgaggttggtcacctccaattt        |
| BMI1_up_a       | TGTAAAACGACGGCCAGTCGATTTGAACATGAGGTATTTTC      |
| BMI1_upstr_b    | TGTAAAACGACGGCCAGTGCTTCTTACACAGCGCCATA         |
| FAS_alt_upstr_a | TGTAAAACGACGGCCAGTAGTCTACTGAAAGGTGGAACAGA      |
| FAS_alt_upstr_b | TGTAAAACGACGGCCAGTCTAAGAGCTATCTACCGTTCCA       |

|                   |                                               |
|-------------------|-----------------------------------------------|
| FAS_upstr_a       | TGTA AACGACGGCCAGTGAAGAAGGAGAAAGGCAGGA        |
| FAS_upstr_b       | TGTA AACGACGGCCAGTCCAACCCCTTTGACATTAGCA       |
| MCL1_exon1a       | TGTA AACGACGGCCAGTcgcccctttccccttt            |
| MCL1_exon1b       | TGTA AACGACGGCCAGTccccgtccaccctcac            |
| MCL1_exon2        | TGTA AACGACGGCCAGTgaatcttgcgccggttttag        |
| MCL1_exon3b       | TGTA AACGACGGCCAGTgcactaagaatgccagtgacc       |
| MCL1_upstr_a      | TGTA AACGACGGCCAGTCCCTGCCCACAAAACATT          |
| MCL1_upstr_b      | TGTA AACGACGGCCAGTGAGATGGGAGAAGCAAGCAG        |
| MDM2_alt_upstr    | TGTA AACGACGGCCAGTCGGATGGTGAGGAGCAG           |
| MDM2_exon11a      | TGTA AACGACGGCCAGTtagcattcctgtgactgagca       |
| MDM2_exon11b      | TGTA AACGACGGCCAGTcaattcaa atgattgtgctaactt   |
| MDM2_exon2        | TGTA AACGACGGCCAGTtgatgtat tttccacagatgtttc   |
| MDM2_exon4        | TGTA AACGACGGCCAGTcctggttgtttaccctattca       |
| MDM2_exon6&7      | TGTA AACGACGGCCAGTaaattgcataagggtttgtgtt      |
| MDM2_exon8        | TGTA AACGACGGCCAGTggtactcaaacagctcaat tttc    |
| MDM2_upstr_a      | TGTA AACGACGGCCAGTGAAGCGGGAGAAGGGAAG          |
| MDM2_upstr_b      | TGTA AACGACGGCCAGTCGGCCTACCCAAAGTGA           |
| miR15_upstr_A     | TGTA AACGACGGCCAGTTATTTCCGGTCCATTTACCA        |
| miR15_upstr_B     | TGTA AACGACGGCCAGTtttctcatctcagggtagcaaaa     |
| miR155_loop       | TGTA AACGACGGCCAGTTGTA CTGTGTCAGAATGCAAGC     |
| miR155_upstr      | TGTA AACGACGGCCAGTCATACGTTTCTTTTGA ACTTAGTCAC |
| miR17_upstr_A     | TGTA AACGACGGCCAGTCCCGGTCTTCTGTTCTCTAAA       |
| miR17_upstr_B     | TGTA AACGACGGCCAGTCAAATTTTTCTTGCTATTAAAGTTGA  |
| PMAIP1_exon1&2    | TGTA AACGACGGCCAGTCTACGTCACCAGGGAAGTT         |
| PMAIP1_exon3a     | TGTA AACGACGGCCAGTTGGGCGTATTAGGTTTTGCT        |
| PMAIP1_exon3b     | TGTA AACGACGGCCAGTGCTGGGAGAAACAGTTTCAG        |
| PMAIP1_exon3c     | TGTA AACGACGGCCAGTAGTGTGCATCCTACAAAAGTGA      |
| PMAIP1_upstr_a    | TGTA AACGACGGCCAGTCAAGCAACTGGGACGACAG         |
| PMAIP1_upstr_b    | TGTA AACGACGGCCAGTTCAAACACGATGTTCTTTCTGG      |
| PUMA_exon1        | TGTA AACGACGGCCAGTggcagtcaagtttgagaagtctg     |
| PUMA_exon2        | TGTA AACGACGGCCAGTcatgcacacacacctccact        |
| PUMA_exon3        | TGTA AACGACGGCCAGTgcgatgggatcactagaaatg       |
| PUMA_exon4a       | TGTA AACGACGGCCAGTcccactcccatcaccatact        |
| PUMA_exon4b       | TGTA AACGACGGCCAGTctctcggtgctccttcactc        |
| PUMA_upstr_b      | TGTA AACGACGGCCAGTGGCGGATCCCCGAGGT            |
| RFWD2_alt_upstr_a | TGTA AACGACGGCCAGTTGCCATTAGACTTTACATTCTTG     |
| RFWD2_alt_upstr_b | TGTA AACGACGGCCAGTCGTAGACCTGAATTTGAATTTTGA    |
| RFWD2_upstr_a     | TGTA AACGACGGCCAGTTTTCCGACTGGTGTACCTT         |
| RFWD2_upstr_b     | TGTA AACGACGGCCAGTAAAAAGCCTACCAGAAATTGTATATT  |
| SKP2_alt_upstr    | TGTA AACGACGGCCAGTCGAGCAGCTCTGCAGTTAAT        |
| SKP2_upstr_a      | TGTA AACGACGGCCAGTTTTCACTACAGAGCGAATCATTTT    |
| SKP2_upstr_b      | TGTA AACGACGGCCAGTCGTCCACAGACCCAATTCTT        |

| <b>Amplicon Name</b> | <b>Reverse primer</b>                     |
|----------------------|-------------------------------------------|
| BAX_exon1            | CAGGAAACAGCTATGACcccctcagtgcttggagat      |
| BAX_exon2&3          | CAGGAAACAGCTATGACcttaggggaggaggagaatgc    |
| BAX_exon4            | CAGGAAACAGCTATGACatccccaggctctcacagat     |
| BAX_exon5            | CAGGAAACAGCTATGACccaatacggagtaatgccatc    |
| BAX_exon6            | CAGGAAACAGCTATGACgaacgggcattaaagagctg     |
| BAX_exon7            | CAGGAAACAGCTATGACgacagggcctgctctcct       |
| BAX_upstr_b          | CAGGAAACAGCTATGACGGACCCGTCATCACC          |
| BCL10_alt_upstr      | CAGGAAACAGCTATGACCAAACGCACTCATAACACACA    |
| BCL10_upstr_b        | CAGGAAACAGCTATGACCCGATTTACTGAACCATCCTT    |
| BCL2_upstr_a         | CAGGAAACAGCTATGACGGCTGCGCACCCCTTTC        |
| BCL2_upstr_b         | CAGGAAACAGCTATGACGAGGATTTCCAGATCGATTCC    |
| BCL6_exon1           | CAGGAAACAGCTATGACttggcaagagcggaaaaa       |
| BCL6_exon10a         | CAGGAAACAGCTATGACtgcagcctttaacgcagttt     |
| BCL6_exon10b         | CAGGAAACAGCTATGACcctccaagagctttttccac     |
| BCL6_exon2           | CAGGAAACAGCTATGACcagtggcaaagtccacagaga    |
| BCL6_exon3           | CAGGAAACAGCTATGACcgtcatcccagatgcagtaa     |
| BCL6_exon4           | CAGGAAACAGCTATGACaaggtttctgatcggggact     |
| BCL6_exon5a          | CAGGAAACAGCTATGACaaatgcagggcaatctcatc     |
| BCL6_exon5b          | CAGGAAACAGCTATGACcaggcaagaaaagaagaaacg    |
| BCL6_exon6           | CAGGAAACAGCTATGACtgaggactgctccaatcaga     |
| BCL6_exon7           | CAGGAAACAGCTATGACaggatcctctccctgtcctg     |
| BCL6_exon8           | CAGGAAACAGCTATGACACTTTCTCTGCCCGCTCT       |
| BCL6_exon9           | CAGGAAACAGCTATGACGTGGTTGCCCCACTGTGT       |
| BCL6_upstr_a         | CAGGAAACAGCTATGACTTTTGCTTTTGCAAGTTTGT     |
| BCL6_upstr_b         | CAGGAAACAGCTATGACTTCGAGGTCCTCATAAGCAGA    |
| BECN1_exon1&2        | CAGGAAACAGCTATGACgccaccataagaattatcacca   |
| BECN1_exon10         | CAGGAAACAGCTATGACgccaatatcaaagcaaacca     |
| BECN1_exon11         | CAGGAAACAGCTATGACtgcctgcttcaattctgttcaa   |
| BECN1_exon12a        | CAGGAAACAGCTATGACtttttcagagaagaaagggaaa   |
| BECN1_exon12b        | CAGGAAACAGCTATGACcagaatttccacatacctgcat   |
| BECN1_exon3          | CAGGAAACAGCTATGACgccaagtagcctgcagaaac     |
| BECN1_exon5&6&7      | CAGGAAACAGCTATGACggaagccatctcctcctg       |
| BECN1_exon8          | CAGGAAACAGCTATGACaccaggcttagtggccaac      |
| BECN1_exon9          | CAGGAAACAGCTATGACtggacagcagtagcagggtg     |
| BECN1_upstr_a        | CAGGAAACAGCTATGACGCAAGGCTCCATCTCAGAAC     |
| BECN1_upstr_b        | CAGGAAACAGCTATGACCCCGATGCTCTTCACCTC       |
| BIM_upstr_a          | CAGGAAACAGCTATGACAAGTGCGTCACAATAGAGTTTG   |
| BIM_upstr_b          | CAGGAAACAGCTATGACACCTTCTCGGTCACACTCAG     |
| BMI_exon10a          | CAGGAAACAGCTATGACgaaaccatttcccatctttcc    |
| BMI_exon10b          | CAGGAAACAGCTATGACgggtatctgcaaaggtcgaa     |
| BMI_exon10c          | CAGGAAACAGCTATGACttttaaattcaacatgcttgctc  |
| BMI_exon10d          | CAGGAAACAGCTATGACgccacatcaactataagtacgcaa |
| BMI_exon1a           | CAGGAAACAGCTATGACCCACGCTCGTCTCATGC        |
| BMI_exon1b           | CAGGAAACAGCTATGACagcgggggaactaaaacgtg     |
| BMI_exon2&3          | CAGGAAACAGCTATGACgaaataaagaggggttgcttca   |
| BMI_exon4&5          | CAGGAAACAGCTATGACgaggatggaagtggtaaagtcaa  |
| BMI_exon6&7          | CAGGAAACAGCTATGACgggcaacacaatccctgata     |
| BMI_exon8&9          | CAGGAAACAGCTATGACtggagtggaaccattctacaaa   |
| BMI1_up_a            | CAGGAAACAGCTATGACTCGCATCGTTTCTCCGTGT      |
| BMI1_upstr_b         | CAGGAAACAGCTATGACCAAACGCACTCATAACACACA    |
| FAS_alt_upstr_a      | CAGGAAACAGCTATGACTTCTGGCCAATTTTCTTT       |
| FAS_alt_upstr_b      | CAGGAAACAGCTATGACGTCAGGAGGATGGGAAGGA      |

|                   |                                                |
|-------------------|------------------------------------------------|
| FAS_upstr_a       | CAGGAAACAGCTATGACTATGTGCTTTGTGGGGAGAC          |
| FAS_upstr_b       | CAGGAAACAGCTATGACGGCTTGTCTCTGTTCCACCT          |
| MCL1_exon1a       | CAGGAAACAGCTATGACgggcgcgaagaaaagcag            |
| MCL1_exon1b       | CAGGAAACAGCTATGACgactcgtttcggtttccaac          |
| MCL1_exon2        | CAGGAAACAGCTATGACccttttagatatccccacctctc       |
| MCL1_exon3b       | CAGGAAACAGCTATGACtgagtattgccaatcagagc          |
| MCL1_upstr_a      | CAGGAAACAGCTATGACGCTCCACGTGCTACCCTAAA          |
| MCL1_upstr_b      | CAGGAAACAGCTATGACGAAGCGGAAGTGAGAAGTGG          |
| MDM2_alt_upstr    | CAGGAAACAGCTATGACGCACCATCAGTAGGTACAGACA        |
| MDM2_exon11a      | CAGGAAACAGCTATGACcaggttgtctaaattcctagggtta     |
| MDM2_exon11b      | CAGGAAACAGCTATGACgcgacagagagactcatctcaa        |
| MDM2_exon2        | CAGGAAACAGCTATGACgagccatgctacaattgaggt         |
| MDM2_exon4        | CAGGAAACAGCTATGACggttagaggtgaactgaaatgtagc     |
| MDM2_exon6&7      | CAGGAAACAGCTATGACggaacaatttaattaagtctaaaagc    |
| MDM2_exon8        | CAGGAAACAGCTATGACtcttattaggactgccagga          |
| MDM2_upstr_a      | CAGGAAACAGCTATGACAACGAAGATGCTGGTTACCG          |
| MDM2_upstr_b      | CAGGAAACAGCTATGACGCTTCTTGCTCCATCTTTCC          |
| miR15_upstr_A     | CAGGAAACAGCTATGACTCTTAGAGTTGGATATCATTTGATACAGT |
| miR15_upstr_B     | CAGGAAACAGCTATGACTgcataattatTTTTaaggagattttaag |
| miR155_loop       | CAGGAAACAGCTATGACTTCTGTTAATGATAAAAAACAAACATGG  |
| miR155_upstr      | CAGGAAACAGCTATGACAAACCGCTCTTCGGAGTTTT          |
| miR17_upstr_A     | CAGGAAACAGCTATGACGCAAATCCGTAATAATGAGTTAGTTT    |
| miR17_upstr_B     | CAGGAAACAGCTATGACTGACTGGTCACAATCTTCAGTT        |
| PMAIP1_exon1&2    | CAGGAAACAGCTATGACCTGGAAGCGCTGGGAGTC            |
| PMAIP1_exon3a     | CAGGAAACAGCTATGACTTTTCAGTGTTCAGAAATGAGTTTTT    |
| PMAIP1_exon3b     | CAGGAAACAGCTATGACTCACCAATGCATATATGGAACTTT      |
| PMAIP1_exon3c     | CAGGAAACAGCTATGACCAGAGGATGTCTGCTGATGG          |
| PMAIP1_upstr_a    | CAGGAAACAGCTATGACACCTTAATCACCGCAGAGGA          |
| PMAIP1_upstr_b    | CAGGAAACAGCTATGACGATGCTGGGATCGGGTGT            |
| PUMA_exon1        | CAGGAAACAGCTATGACcacctgtgacagcttcttgct         |
| PUMA_exon2        | CAGGAAACAGCTATGACcagttcctccgagctctccag         |
| PUMA_exon3        | CAGGAAACAGCTATGACagctgcccacatctgg              |
| PUMA_exon4a       | CAGGAAACAGCTATGACctggagcaaccggcaaac            |
| PUMA_exon4b       | CAGGAAACAGCTATGACctctcccaccactcacaag           |
| PUMA_upstr_b      | CAGGAAACAGCTATGACACCCCATGCCAAATTTTCAT          |
| RFWD2_alt_upstr_a | CAGGAAACAGCTATGACTTTCAACAACAAAGTGAAATAGGT      |
| RFWD2_alt_upstr_b | CAGGAAACAGCTATGACGTGGCCACATTTTGTCTATGT         |
| RFWD2_upstr_a     | CAGGAAACAGCTATGACCAATAATGGGAAAACAGATTTTG       |
| RFWD2_upstr_b     | CAGGAAACAGCTATGACAGAGGGCAGGCCGTCTTAAT          |
| SKP2_alt_upstr    | CAGGAAACAGCTATGACGCCTGACAGCAGTTCAGAAG          |
| SKP2_upstr_a      | CAGGAAACAGCTATGACAGGTGAGAGGCTGCGAACT           |
| SKP2_upstr_b      | CAGGAAACAGCTATGACGCAGCCAGACCCGCTAAG            |
