# Supplementary material for: Genetic Variation in Cell Death Genes and Risk of Non-Hodgkin Lymphoma
Source: PubMed Central journal article supplement (PMC3274532; doi:10.1371/journal.pone.0031560), 2012-02-07
Supplement: pone.0031560.s004.pdf [file pone.0031560.s004.pdf]

**Table S4 - Variants available for testing after data cleaning**

|                                                                                                                                                                                                                                                                                                                                                    |  |
|----------------------------------------------------------------------------------------------------------------------------------------------------------------------------------------------------------------------------------------------------------------------------------------------------------------------------------------------------|--|
| <p><b>BAX</b></p> <p>rs11667229<br/> rs11667351<br/> rs4645878<br/> rs1805419<br/> rs4645900<br/> rs704243<br/> rs905238</p>                                                                                                                                                                                                                       |  |
| <p><b>BCL2</b></p> <p>rs4987873<br/> rs4987853<br/> rs4987852<br/> rs1564483<br/> rs4987845<br/> rs1982673<br/> rs17677569<br/> rs10503078<br/> rs4456611<br/> rs1026825<br/> rs7230970<br/> rs4941185<br/> rs7240326<br/> rs7226979<br/> rs7236090<br/> rs17759659<br/> rs2850761<br/> rs1462129<br/> rs1801018<br/> rs2279115<br/> rs1944423</p> |  |
| <p><b>BCL6</b></p> <p>rs1474326<br/> rs2229362<br/> rs41268621<br/> rs1056932<br/> rs2272148<br/> BCL6-x8(2139)-C*T<br/> rs3733017<br/> BCL6-x10(3083)-A*T<br/> rs1523474<br/> rs3774298<br/> rs4686467</p>                                                                                                                                        |  |
| <p><b>BCL10</b></p> <p>rs962409</p>                                                                                                                                                                                                                                                                                                                |  |

|                                                                                                                                                                                                |   |
|------------------------------------------------------------------------------------------------------------------------------------------------------------------------------------------------|---|
| rs12134420<br>rs12563515<br>rs4949927<br>rs4949928<br>rs2735594<br>rs11161582                                                                                                                  |   |
| <b>BCL2L11</b><br>rs17041868<br>rs10204044<br>rs17484848<br>rs3761704<br>rs1877331<br>rs17041883<br>rs1470053                                                                                  |   |
| <b>BBC3</b><br>rs884171<br>rs45474992<br>rs2032809                                                                                                                                             |   |
| <b>BECN1</b><br>rs10512488                                                                                                                                                                     |   |
| <b>BMI1</b><br>rs985000<br>BMI1-UPSTR(-809)-C*T                                                                                                                                                |   |
| <b>FAS</b><br>rs983751<br>rs978522<br>rs1926197<br>rs3758483<br>rs2234767<br>rs10509561<br>rs1571013<br>rs2147420<br>rs1159120<br>rs9658750<br>rs9658761<br>rs982764<br>rs2234978<br>rs1051070 |   |
| <b>MCL1</b><br>rs6655975<br>rs11204666<br>rs878471<br>rs35392872<br>rs34355066<br>MCL1-x3(1290-1297)-DEL(aacctagc)<br>rs34645101<br>rs35661734                                                 | * |

|                                                                                                                                                                           |   |
|---------------------------------------------------------------------------------------------------------------------------------------------------------------------------|---|
| <b>MDM2</b><br>rs937283<br>rs2870820<br>rs3730536<br>rs1625525<br>rs1695144<br>rs1695147<br>rs769412                                                                      |   |
| <b>PMAIP1</b><br>rs9957673<br>rs11663656<br>PMAIP1-x2(422)-G*A<br>rs7240884<br>rs1041978<br>rs3826598<br>rs4286195                                                        | * |
| <b>RFWD2</b><br>rs6676805<br>rs12041226<br>rs12142010<br>rs2481641<br>rs617078<br>rs11587785<br>rs12144612<br>rs12738115<br>RFWD2-UPSTR(-184)-C*G<br>RFWD2-IVS2(-297)-A*G |   |
| <b>SKP2</b><br>rs10071838<br>rs33671<br>rs12655652<br>rs4440390<br>rs33678<br>rs2362973<br>rs7715070<br>rs2287935<br>rs3804439<br>rs17279275<br>rs7731023                 |   |
| <b>MIR15A</b><br>rs2476391<br>miR15a-UPSTR(-1296)-A*G<br>rs9535416                                                                                                        |   |
| <b>MIR1792</b><br>rs17642969                                                                                                                                              |   |
| <b>MIR155</b><br>rs972389                                                                                                                                                 |   |

|           |  |
|-----------|--|
| rs928883  |  |
| rs2829803 |  |

\* denotes SNPs that passed quality control measures but were not analyzed because there were insufficient samples possessing the minor allele.
