# Supplementary material for: Genetic Variation in Cell Death Genes and Risk of Non-Hodgkin Lymphoma
Source: PubMed Central journal article supplement (PMC3274532; doi:10.1371/journal.pone.0031560), 2012-02-07
Supplement: pone.0031560.s007.pdf [file pone.0031560.s007.pdf]

**Table S7 - Interaction table displaying odds ratios for rs928883 and two AICDA SNPs, rs714629 and rs9971686, derived under an additive model**

| <b>rs928883</b> | <b>rs714629</b> |      |      | <b>rs9971686</b> |      |      |
|-----------------|-----------------|------|------|------------------|------|------|
|                 | CC              | CG   | GG   | AA               | AG   | GG   |
| GG              | 1.00            | 0.42 | 0.18 | 1.00             | 0.26 | 0.07 |
| GA              | 2.80            | 0.95 | 0.32 | 2.80             | 0.82 | 0.24 |
| AA              | 7.84            | 2.13 | 0.58 | 7.84             | 2.56 | 0.83 |
