# Supplementary material for: Genetic Variation in Cell Death Genes and Risk of Non-Hodgkin Lymphoma
Source: PLoS One. 2012 Feb 7;7(2):e31560. doi: 10.1371/journal.pone.0031560 (PMC3274532; doi:10.1371/journal.pone.0031560)
Supplement: Table S1 — Characteristics of the study population. DLBCL = Diffuse Large B-Cell Lymphoma, FL = Follicular Lymphoma, MZ/MALT = Marginal Zone lymphoma/Mucosa-Associated Lymphoma Tissue lymphoma,MCL = Mantle Cell lymphoma, SLL = Small Lymphocytic Lymphoma, LPL = Lymphoplasmacytic Lymphoma, Misc. B-cell = Miscellaneous B-cell lymphoma, MF = Mycosis Fungoides, PTCL = Peripheral T-Cell Lymphoma, Misc. T-cell = Miscellaneous T-cell lymphoma. (PDF) [file pone.0031560.s001.pdf]

**Table S1 - Characteristics of the study population.**

|                          | <b>Cases (%)</b>  | <b>Controls (%)</b> |
|--------------------------|-------------------|---------------------|
| <b>Gender</b>            |                   |                     |
| Male                     | 463 (58%)         | 420 (53%)           |
| Female                   | 334 (42%)         | 370 (47%)           |
| <b>Age group (years)</b> |                   |                     |
| 20-49                    | 150 (19%)         | 206 (26%)           |
| 50-59                    | 194 (24%)         | 169 (21%)           |
| 60-69                    | 214 (27%)         | 206 (26%)           |
| 70+                      | 239 (30%)         | 209 (26%)           |
| <b>Ethnicity</b>         |                   |                     |
| Caucasian                | 625 (78%)         | 610 (77%)           |
| Asian                    | 80 (10%)          | 88 (11%)            |
| South Asian              | 29 (4%)           | 37 (5%)             |
| Mixed/Other              | 36 (5%)           | 36 (5%)             |
| Unknown/Refused          | 27 (3%)           | 19 (2%)             |
| <b>Pathology</b>         |                   |                     |
| <b>B-cell lymphomas</b>  |                   |                     |
| DLBCL                    | 208 (26%)         | -                   |
| FL                       | 223 (28%)         | -                   |
| MZL/ MALT                | 95 (12%)          | -                   |
| MCL                      | 47 (6%)           | -                   |
| SLL/CLL                  | 43 (5%)           | -                   |
| LPL                      | 43 (5%)           | -                   |
| MISC BCL                 | 62 (8%)           | -                   |
| <b>T-cell lymphomas</b>  |                   |                     |
| MF                       | 40 (5%)           | -                   |
| PTCL                     | 29 (4%)           | -                   |
| MISC TCL                 | 7 (1%)            | -                   |
| <b>Total</b>             | <b>797 (100%)</b> | <b>790 (100%)</b>   |

DLBCL = Diffuse Large B-Cell Lymphoma, FL = Follicular Lymphoma, MZ/MALT = Marginal Zone lymphoma/Mucosa-Associated Lymphoma Tissue lymphoma, MCL = Mantle Cell lymphoma, SLL = Small Lymphocytic Lymphoma, LPL=Lymphoplasmacytic Lymphoma, Misc. B-cell = Miscellaneous B-cell lymphoma, MF = Mycosis Fungoides, PTCL = Peripheral T-Cell Lymphoma, Misc. T-cell = Miscellaneous T-cell lymphoma.
